# Supplementary material for: Phenotypic Tfh development promoted by CXCR5-controlled re-localization and IL-6 from radiation-resistant cells
Source: PubMed Central journal article supplement (PMC4624673; doi:10.1007/s13238-015-0210-0), 2015-09-24
Supplement: 13238_2015_210_MOESM1_ESM.pdf [file 13238_2015_210_MOESM1_ESM.pdf]

**Figure S1.**

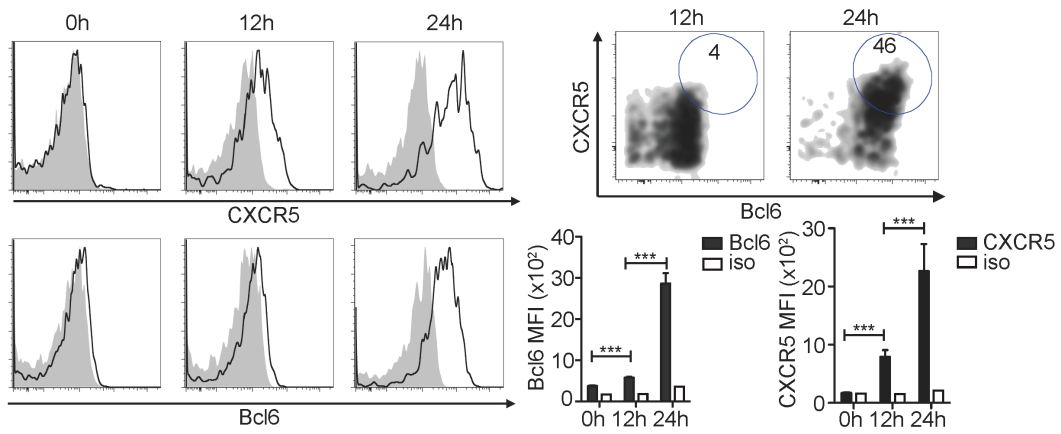

**Figure S1. Levels of CXCR5, Bcl6, and PD-1 expression on previously activated OT-II T cells that were re-activated for 1 day in B6 recipients.** The data are displayed as in Figs. 1A and 1B and represent 3 independent experiments (3-4 mice per group).

**Figure S2.**

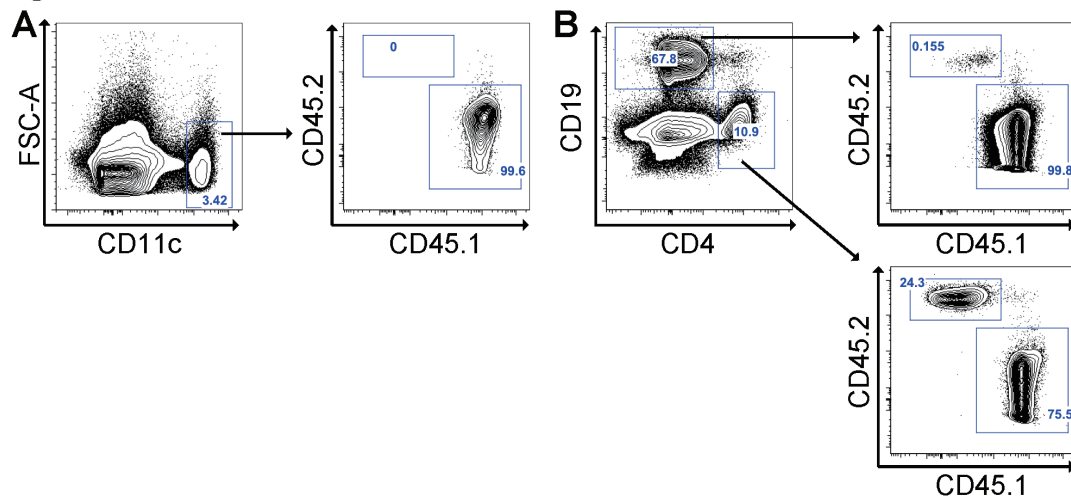

**Figure S2. Replacement of DC and lymphocyte compartments by donor cells in radiation BM chimera.** CD45.2 and CD45.1 contents in CD11c<sup>+</sup> DC compartment (A), CD19<sup>+</sup> B cell compartment and CD4<sup>+</sup> T cell compartment (B) seven weeks after reconstitution of lethally irradiated CD45.2 B6 mice with CD45.1 bone marrows.
